# Supplementary material for: Exercise during pregnancy for preventing gestational diabetes mellitus and hypertensive disorders: An umbrella review of randomised controlled trials and an updated meta‐analysis
Source: PubMed Central journal article supplement — BJOG. 2022 Oct 17;130(3):264–75. doi: 10.1111/1471-0528.17304 (PMC10092296; doi:10.1111/1471-0528.17304), 2022-10-17

Required Sample Size is a Two-sided graph

Physical Activity versus Usual Care and GDM incidence. TSA Analysis.

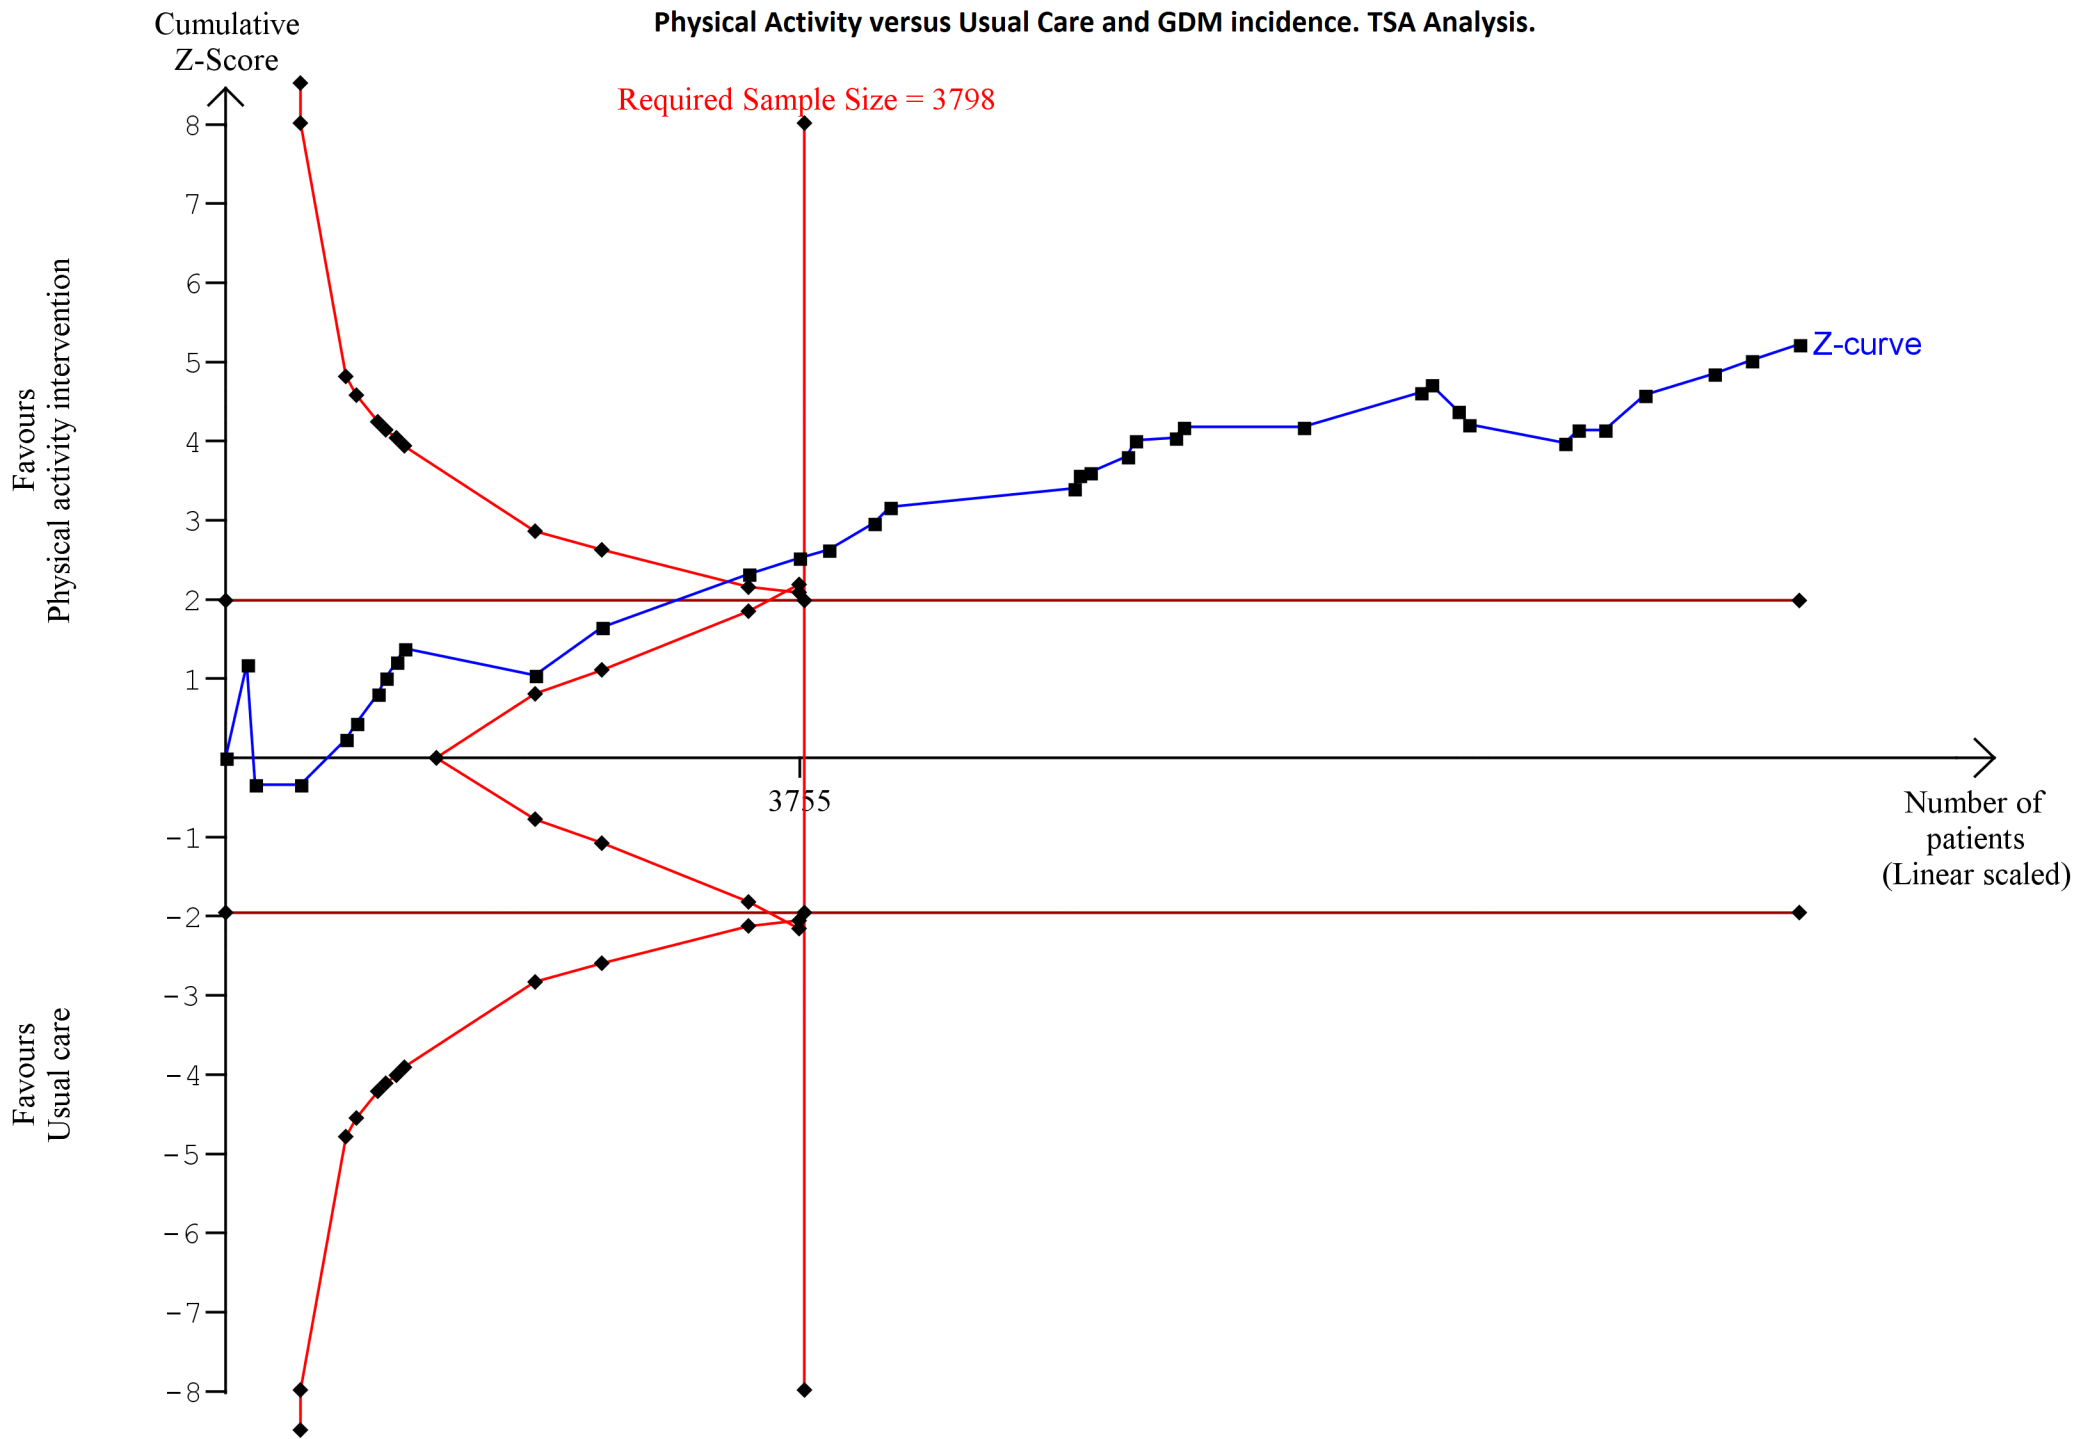

Supplement: BJO-130-264-s015.pdf [file BJO-130-264-s015.pdf]
