# Supplementary figures and images for: Exercise during pregnancy for preventing gestational diabetes mellitus and hypertensive disorders: An umbrella review of randomised controlled trials and an updated meta‐analysis
Source: PubMed Central journal article supplement — BJOG. 2022 Oct 17;130(3):264–75. doi: 10.1111/1471-0528.17304 (PMC10092296; doi:10.1111/1471-0528.17304), 2022-10-17

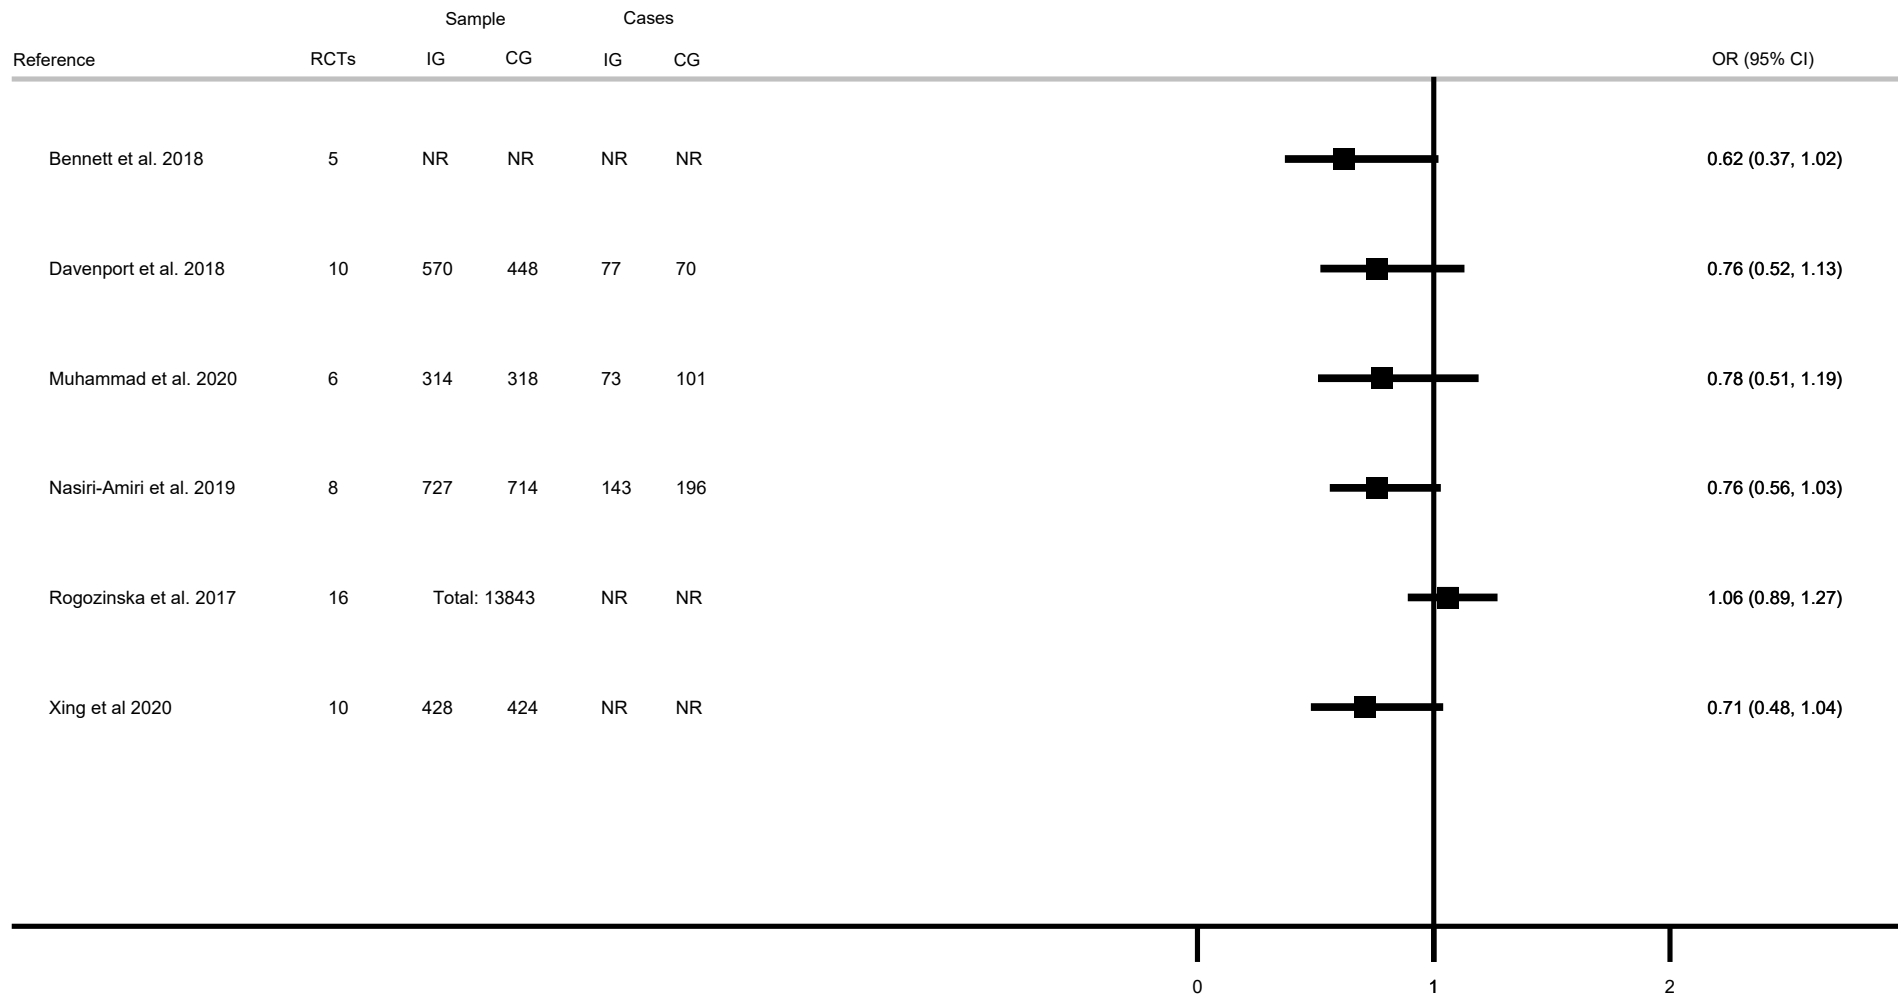

Supplement: BJO-130-264-s003.pdf [file BJO-130-264-s003.pdf]

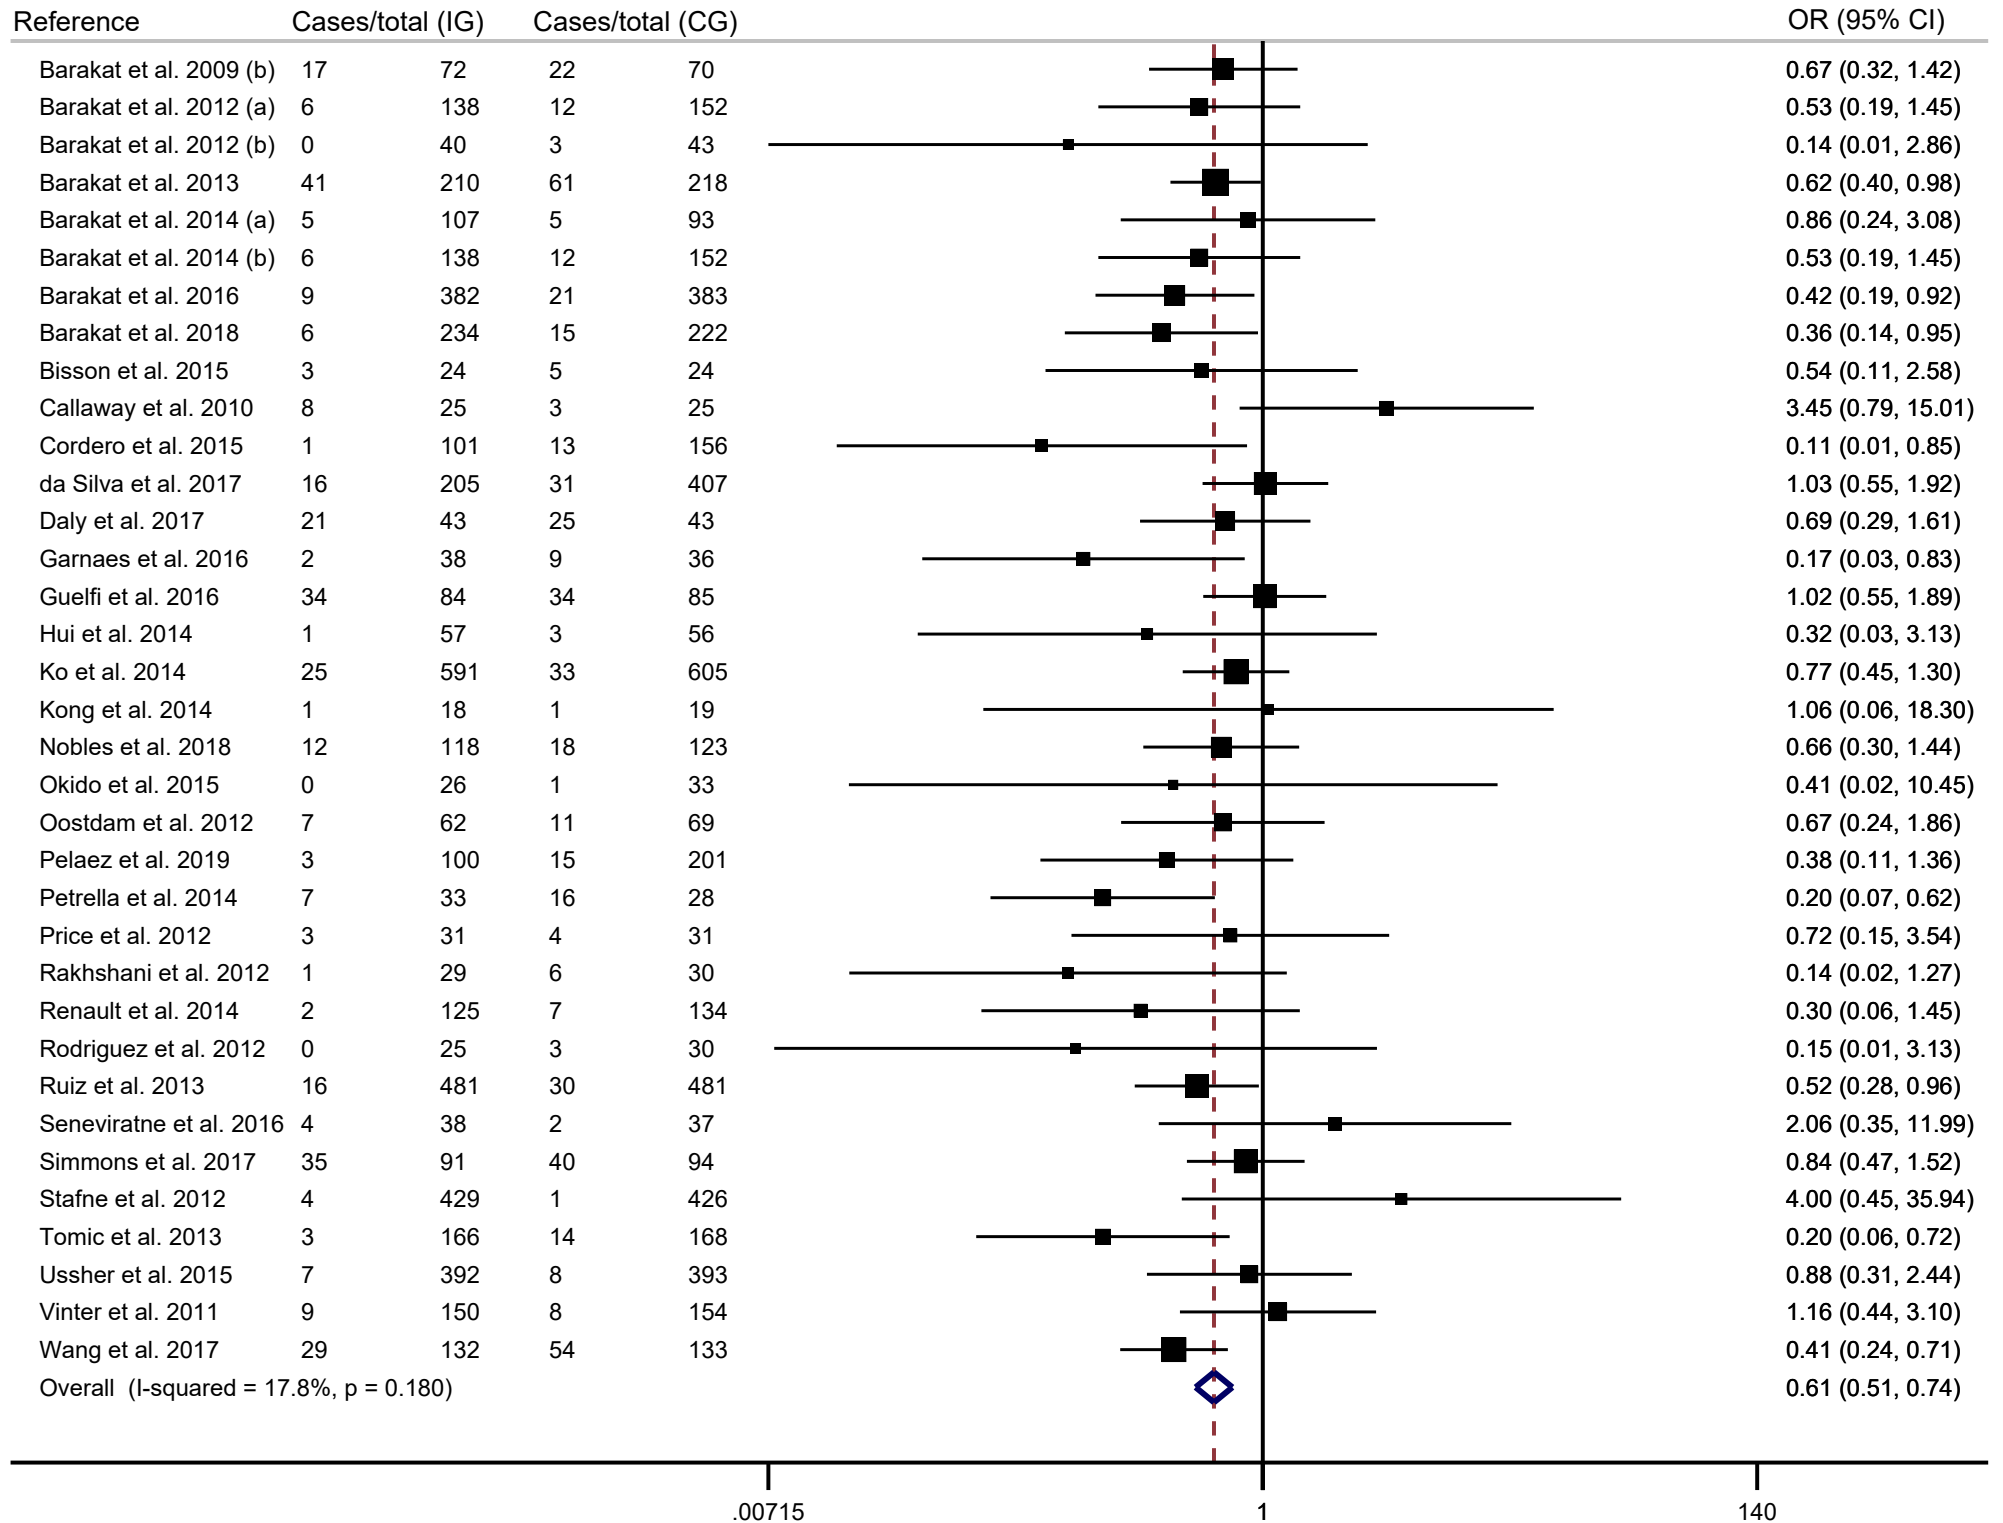

Supplement: BJO-130-264-s004.pdf [file BJO-130-264-s004.pdf]

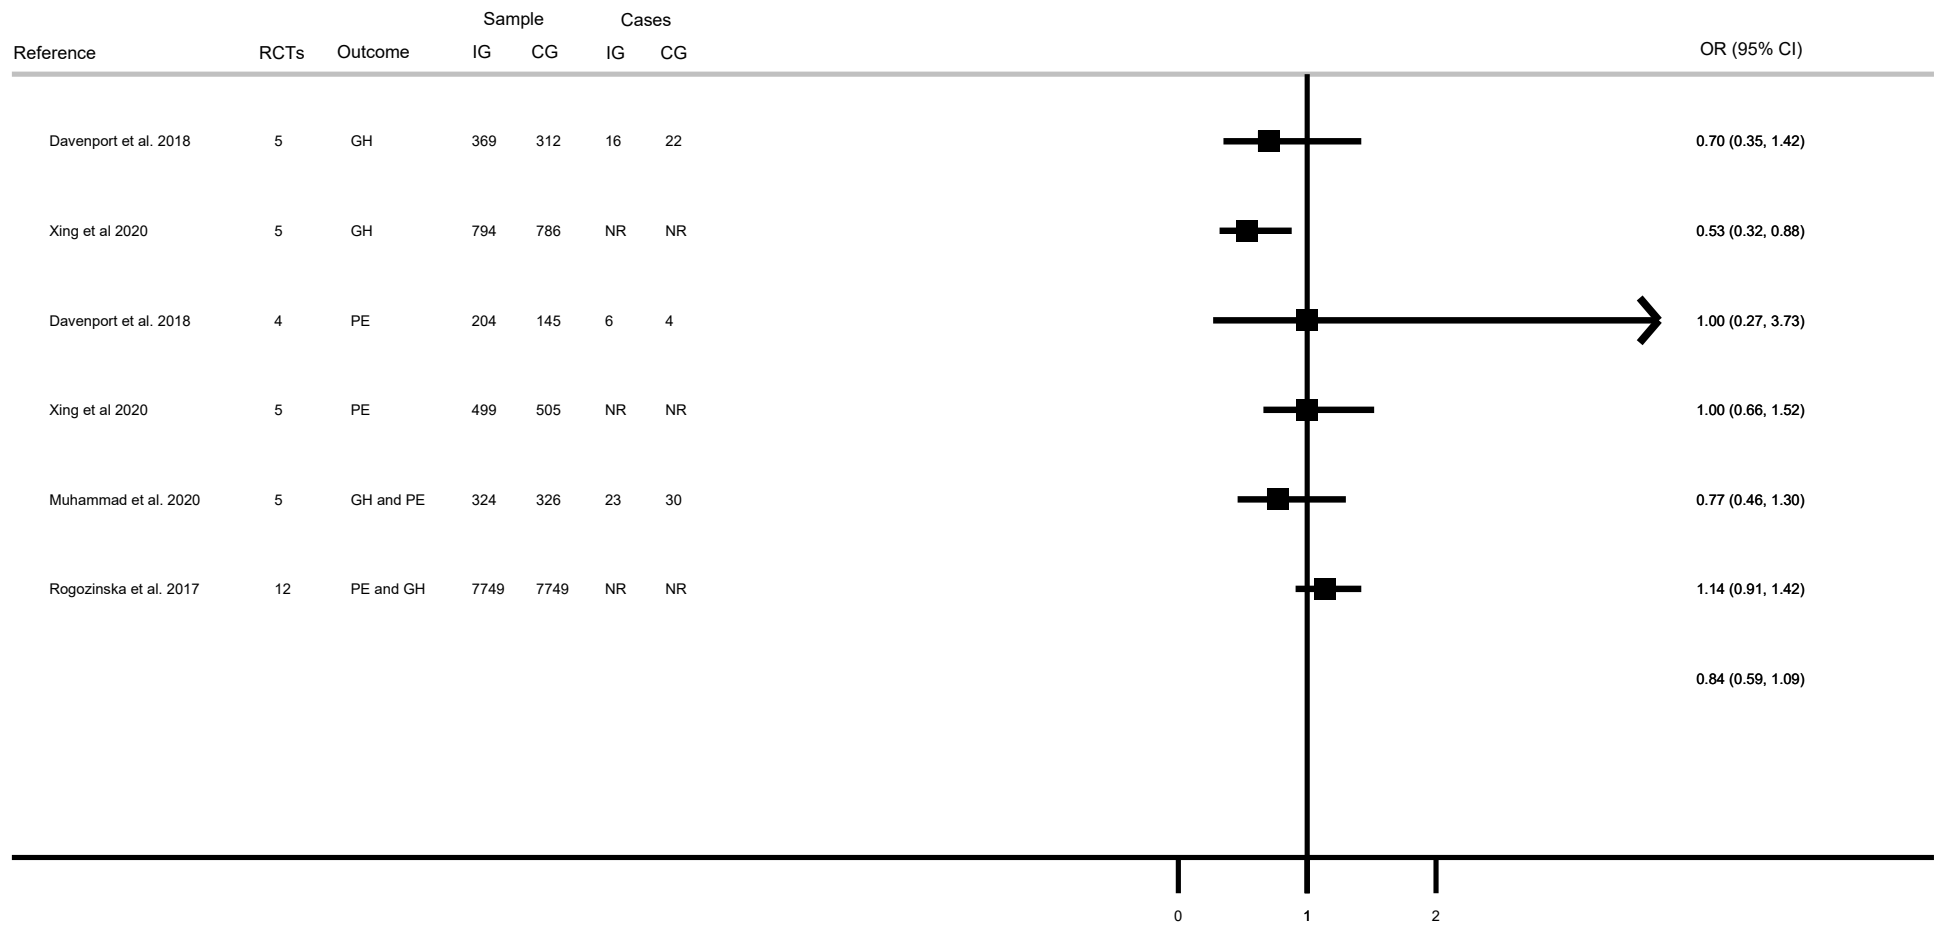

Supplement: BJO-130-264-s007.pdf [file BJO-130-264-s007.pdf]

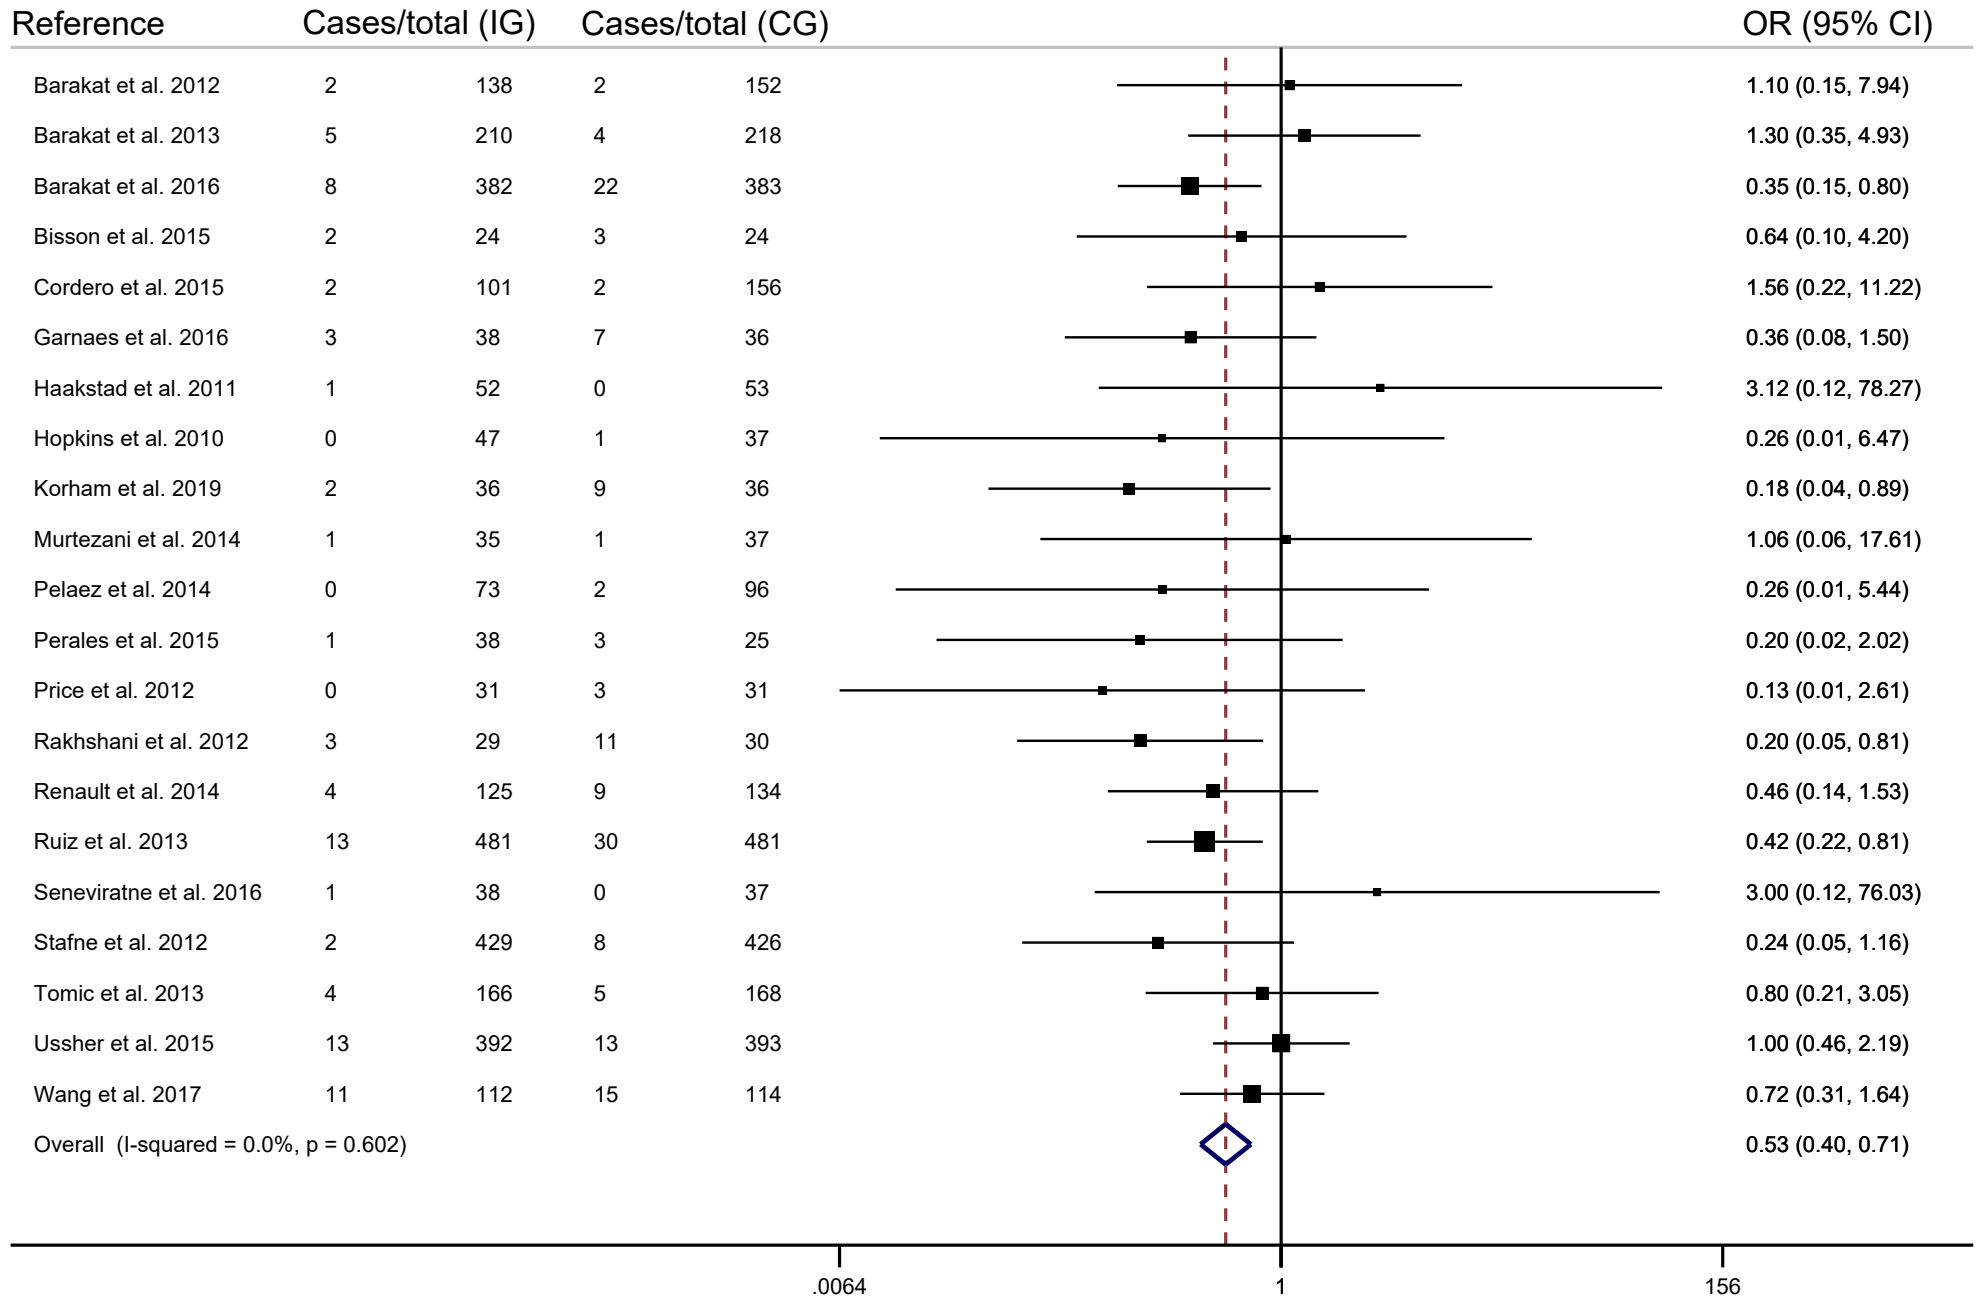

Supplement: BJO-130-264-s011.pdf [file BJO-130-264-s011.pdf]

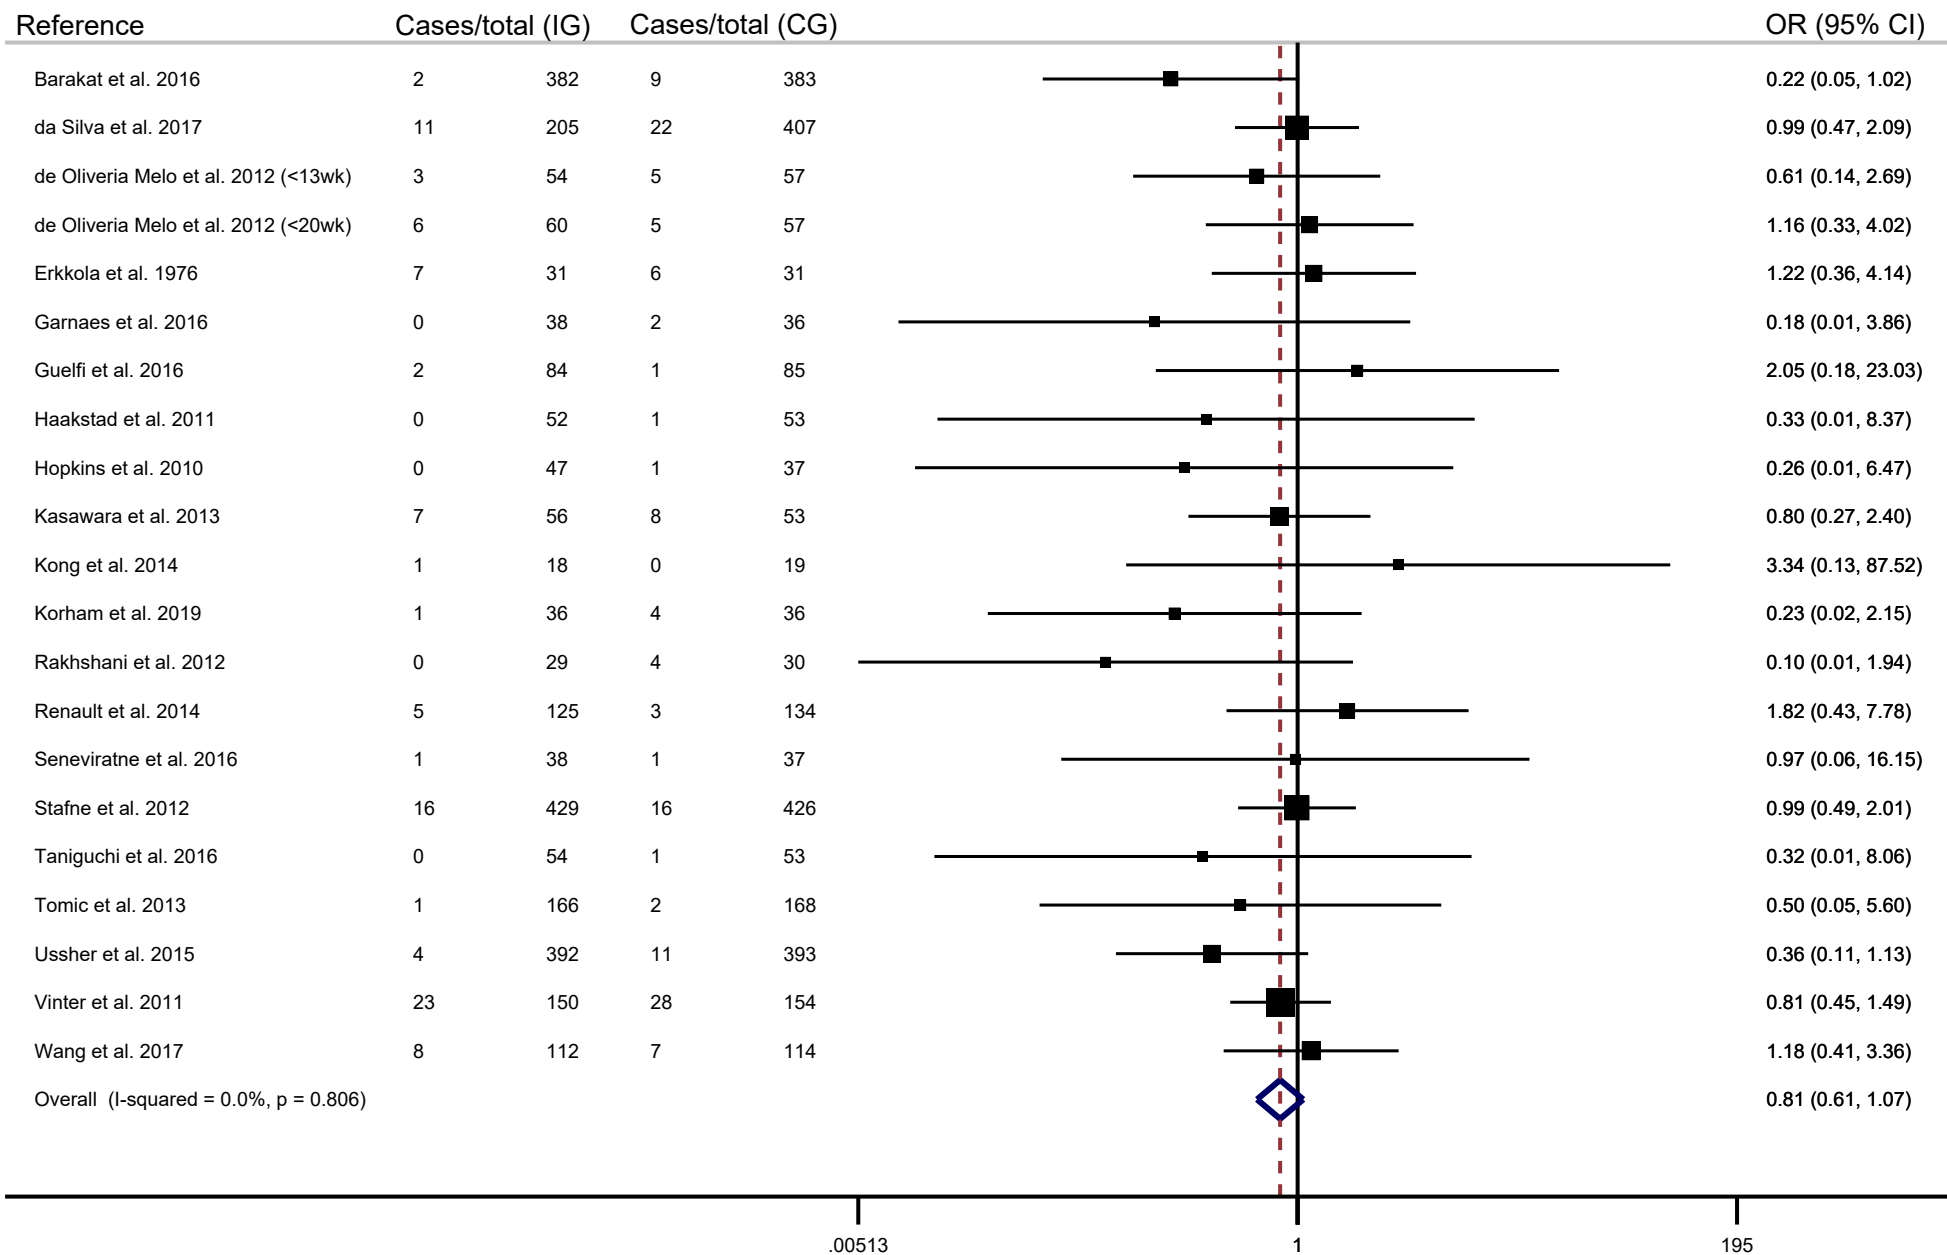

Supplement: BJO-130-264-s018.pdf [file BJO-130-264-s018.pdf]
